# Supplementary material for: Tuning Epithelial Cell–Cell Adhesion and Collective Dynamics with Functional DNA-E-Cadherin Hybrid Linkers
Source: PubMed Central journal article supplement (PMC8759084; doi:10.1021/acs.nanolett.1c03780), 2021-12-23
Supplement: nl1c03780_si_001.pdf [file nl1c03780_si_001.pdf]

## Supporting Information

### Tuning epithelial cell-cell adhesion and collective dynamics with functional DNA-E-cadherin hybrid linkers

Andreas Schoenit<sup>1,2,3</sup>, Cristina Lo Giudice<sup>2</sup>, Nina Hahnen<sup>1,2</sup>, Dirk Ollech<sup>2,4</sup>, Kevin Jahnke<sup>1,5</sup>, Kerstin Göpfrich<sup>1,5,\*</sup>, Elisabetta Ada Cavalcanti-Adam<sup>2,\*</sup>

1 Max Planck Institute for Medical Research, Biophysical Engineering Group, Jahnstraße 29, D-69120 Heidelberg, Germany

2 Department of Cellular Biophysics, Growth Factor Mechanobiology Group, Max Planck Institute for Medical Research, Jahnstraße 29, D-69120 Heidelberg, Germany

3 Present address: Institut Jacques Monod, CNRS and Université de Paris, 75013 Paris, France

4 Present address: Applied Physics Department, Science for Life Laboratory and KTH Royal Technical University, Tomtebodavägen 23A, S-17165, Stockholm, Sweden

5 Department of Physics and Astronomy, Heidelberg University, D-69120 Heidelberg, Germany

\* correspondence: [kerstin.goepfrich@mr.mpg.de](mailto:kerstin.goepfrich@mr.mpg.de), [eacavalcanti@mr.mpg.de](mailto:eacavalcanti@mr.mpg.de)

## Materials and Methods

### Design of the DNA linkers

All DNA linkers were designed and their hybridization strength was calculated using the Nucleic Acid Package (NUPACK) <sup>1</sup>. It provides a thermodynamic analysis of interacting nucleic acid strands and calculates the free energy in kcal/mol of the secondary structure as well as equilibrium concentrations at a given temperature.

We designed our linker systems to consist of a 15-bp long anchor strand functionalized with either cholesterol (chol) or benzylguanine (bg). To the anchor strand, complementary, 26- to 30-bp-long linker strands (Strand 1 and Strand 2) with different hybridization strengths were bound. The complementary part of the linker strands is called binding region and the strength of the linker is calculated only for this sequence.

35 For the initial design of the 17.7 kcal/mol linker (called DNA linker in the manuscript  
36 until **Figure 4**), the *Design* function in NUPACK was used to generate ideal DNA  
37 sequences without unwanted self-complementarity. The sequence was designed to  
38 achieve the highest hybridization strength at 37 °C. A one base pair mismatch at the  
39 end of the sequence increased the binding strength from 17.2 kcal/mol without the  
40 mismatch to 17.7 kcal/mol. The hybridization sequence for the 3.2 kcal/mol linker was  
41 manually generated by using 11 adenine/thymine bases. The 10.4 kcal/mol linker  
42 consists of 13 adenine/thymine bases. The nominal hybridization strength of these two  
43 linkers is higher than the indicated values, which were corrected by the bound fraction  
44 at 37 °C (see **Figure S3**) resulting in the final values of 10.4 kcal/mol or 3.2 kcal/mol.  
45 Example calculation for the 3.2 kcal/mol linker: Nominal hybridization strength at 37 °C  
46 is 10.41 kcal/mol, the bound fraction is 0.31, resulting in the final value of 3.23 kcal/mol.  
47 The sequence for toehold mediated strand displacement was described elsewhere <sup>2</sup>.  
48 This toehold sequence was added to the sequence of the DNA linker 1. The invader  
49 strand is the complementary strand to the DNA linker 1 with the toehold overhang  
50 (called Reversible DNA linker 1).

51

## 52 DNA sequences

53

54 All custom DNA strands were purchased from Biomers (Ulm, Germany, purification:  
55 HPLC). Some of the linker strands were modified with a fluorophore. All DNA strands  
56 were diluted in Milli-Q water (Merck, Germany) to a stock concentration of 100 µM and  
57 stored at -20C until use.

58

59 *Anchor strand; melting temperature 63.3 °C:*

60 5'/GTTCAACAAGAAAGCG/3'/Chol

61 5'/GTTCAACAAGAAAGCG/3'/BG

62

63 *17.7 kcal/mol linker (called DNA linker) strand 1; melting temperature binding region*  
64 *57.3 °C:*

65 5'/CGCTTTCTTGTGAACACTCTTTCATCT/3'

66

67 *17.7 kcal/mol linker (called DNA linker) strand 2:*

68 Cy5/5'/CGCTTTCTTGTGAACAGATAGTGAAAGAGA/3'

69

70 *10.4 kcal/mol linker strand 1; melting temperature binding region 42.9 °C:*

71 5'/CGCTTTCTTGTGAACTTTTTTTTTTTTT/3'

72

73 *10.4 kcal/mol linker strand 2:*

74 5'/CGCTTTCTTGTGAACAAAAAAAAAAAAA/3'

75

76 *3.2 kcal/mol linker strand 1; melting temperature binding region 35.2 °C:*

77 5'/CGCTTTCTTGTGAACTTTTTTTTTTTTT/3'

78

79 *3.2 kcal/mol linker strand 2:*

80 5'/CGCTTTCTTGTGAACAAAAAAAAAAAAA/3'

81

82 *Reversible DNA linker strand 1:*

83 Atto647N/5'/CGCTTTCTTGTGAACACTCTTTCACATCTTCTCCATGTCACCTTC/3'

84

85 *Invader strand; melting temperature 85.7 °C:*

86 5'/GAAGTGACATGGAGAAGATAGTGAAAGAGTGTTTCCACAAGAAAGCG/3'

87

88 DNA linker assembly

89

90 Duplexes of anchor and linker strand were pre-annealed by mixing 5 µl anchor strand,  
91 5 µl linker strand, 20 µl MgCl<sub>2</sub> (100 mM, catalog no. M8226, Sigma-Aldrich) and 20 µl  
92 phosphate-buffered saline (PBS). This resulted in a final DNA concentration of 10 µM  
93 per strand. For duplex formation, the mix was put in a thermocycler (Bio-Rad), heated  
94 to 65 °C for 5 min and cooled down stepwise (10 °C every 30 sec) to 5 °C.

95

96 Plasmids and cloning

97

98 The plasmid coding for full-length E-cadherin-GFP was kindly provided by Jennifer  
99 Stow (Institute of Molecular Biosciences, University of Queensland, Addgene plasmid  
100 #28009). The plasmid coding for SNAP-E-cadherin345-mCherry, a truncated E-  
101 cadherin with an intracellular mCherry tag, was created via Gibson Assembly (GA). A  
102 SNAP-tag was introduced in the E-cadherin sequence between R154 and N376,

103 replacing the extracellular domains EC1 and EC2 while maintaining the ER-import  
104 sequence and furin cleavage site of the E-cadherin prodomain.

105 In brief, the plasmid backbone including the E-cadherin prodomain was amplified from  
106 the template plasmid E-cadherin-EGFP-Halo (pDO33, unpublished data) via PCR  
107 using primers Fwd: *GAA TTC TAG AGG GCC CTA TTC TAT AGT GTC ACC TAA*  
108 *ATG CTA GAG CTC GC* and Rev: *TCT CTT CTG TCT TCT GAG GCC AGG AGA*  
109 *GGA GTT GGG AAA TGT GAG C*. From the same template the truncated E-cadherin  
110 sequence was amplified using primers Fwd: *ATC CGC GTT TAA ACT CGA GGT TAA*  
111 *TAA TCC CAC CAC GTA CAA GGG TCA GG* and Rev: *CCT TGC TCA CCA TAC*  
112 *TTC CTC CTC CTC CGT CGT CCT CGC CGC CTC CG*. The SNAP and mCherry  
113 fragments were amplified from template plasmid SNAPf-mCherry (pDO13,  
114 unpublished data) using primers Fwd: *TGG CCT CAG AAG ACA GAA GAG AGA CAA*  
115 *AGA CTG CGA AAT GAA GC* and Rev: *CCT TGT ACG TGG TGG GAT TAT TAA*  
116 *CCT CGA GTT TAA ACG C* for SNAP and Fwd: *CGGA GGC GGC GAG GAC GAC*  
117 *GGA GGA GGA GGA AGT ATG GTG AGC AAG G* and Rev: *TGA CAC TAT AGA ATA*  
118 *GGG CCC TCT AGA ATT CTT ACT TGT ACA GCT CGT CCA TGC C*. All four  
119 fragments were assembled using the 2 x GA Master Mix (catalog no. E2611, NEB)  
120 following the manufacturer's instructions.

121

## 122 Length of the established DNA-E-cadherin hybrid linker

123

124 We calculate an increased length of ~ 2.8 nm of the fully established *trans*-dimer of the  
125 DNA-E-cadherin hybrid compared to the natural E-cadherin based on the following  
126 assumptions:

127

128 Length of DNA-SNAP:

- 129 • 1 bp = ~ 3 Å<sup>3</sup>, 35 bp = ~ 135 Å = ~ 13.5 nm
- 130 • SNAP-tag C-terminal = ~ 2 nm<sup>4</sup>
- 131 → Total ~ 17.5 nm

132

133 E-cadherin modification:

- 134 • Full-length E-cadherin *trans*-dimer = 38.5 nm<sup>5</sup>
- 135 • Overlap EC1-EC2 in *trans*-dimer = 2.9 nm (measured)
- 136 • EC1 + EC2 = 8.8 nm (measured)

137 → Size reduction by removing EC12 on both sides of *trans*-dimer = 2 x 8.8 nm –  
138 2.9 nm = 14.7 nm

139

140 This leads to a total increase in length through DNA-SNAP addition (17.5 nm) and  
141 EC12 removal (14.7 nm) of 2.8 nm.

142

### 143 Cell culture

144

145 Jurkat T-cells (catalog no. TIB-152, ATCC) were grown in culture medium (RPMI,  
146 catalog no. 11875093, Gibco) supplemented with 10 % Fetal Bovine Serum (FBS,  
147 catalog no. 11140035, Gibco) and 1% Penicillin-Streptomycin (catalog no. P4333  
148 Sigma Aldrich) at 37°C and 5% CO<sub>2</sub>. They were split every 2-3 days. Before further  
149 processing, cells were centrifuged (5 min, 750 rpm), resuspended in phosphate-  
150 buffered saline (PBS, catalog no. 10010023, Gibco), centrifuged and finally  
151 resuspended in culture medium.

152 A431D cells initially described by <sup>6</sup> were kindly provided by the group of René-Marc  
153 Mège (Institut Jacques Monod, Université de Paris). They were grown in culture  
154 medium (DMEM, catalog no. 1188002, Gibco) supplemented with 10% Fetal Bovine  
155 Serum (FBS, catalog no. 10270106, Gibco) and 1% Penicillin-Streptomycin (catalog  
156 no. P4333, Sigma Aldrich) at 37 °C and 5% CO<sub>2</sub>. They were passaged every 2-3 days  
157 using 0.05% Trypsin (catalog no. 9002077, Merck). Before further processing, the  
158 culture medium was aspirated and cells were rinsed with PBS to remove dead cells  
159 and debris.

160

### 161 Generation of SNAP-E-cadherin-mCherry and E-cadherin-GFP cell lines

162

163 A431D cells have been transfected with either E-cadherin-GFP or SNAP-E-cadherin-  
164 mCherry via electroporation using an Amaxa Nucleofector I Device (Lonza, Cologne)  
165 with the Amaxa Cell line Nucleofector Kit T (program X-01; Lonza) according to the  
166 manufacturers protocol. Starting one day after transfection, cells were incubated in  
167 antibiotic selection medium (DMEM supplemented with 10 % FBS and 750 µg/ml  
168 geneticin (catalog no. 10131035, Gibco) for two weeks. Finally, antibiotic selected cells  
169 were sorted via fluorescence activated cell sorting (FACS) using a BD FACS Melody  
170 with 3 lasers (488/561/640) and 8 colors (2-2-4) configuration to ensure comparable

171 expression of E-cadherin-GFP or SNAP-E-cadherin-mCherry for the experiments  
172 performed in this work.

173

#### 174 Linking of cells

175

176 Cells were incubated with linker medium (cultivation medium containing 10 mM MgCl<sub>2</sub>  
177 and 1 μM pre-annealed linker dsDNA) for 1 h at standard conditions (37 °C, 5% CO<sub>2</sub>)  
178 for all experiments except the force spectroscopy and the subcellular localization of  
179 YAP. The pre-annealed linker dsDNA consists of an anchor strand functionalized with  
180 either cholesterol or benzylguanine bound to Linker strand 1 or Linker strand 2. Fixed  
181 samples were mounted on a laser scanning confocal microscope (Zeiss LSM 900,  
182 Oberkochen, Germany) equipped with a 63x oil objective (Plan-Apochromat 63×/1.4  
183 Oil DIC M27) and an Airyscan 2 module. Z-stacks of images were taken using the  
184 Airyscan mode with as step size of 0.13 μm. Within the ZEN software, an automated  
185 deconvolution was performed on the Airyscan data. All images were visualized using  
186 Fiji <sup>7</sup>. For the visualization, maximum projections of the z-stacks were generated and  
187 brightness and contrast were adjusted. Live-cell timelapse videos were acquired using  
188 a laser scanning confocal microscope (Zeiss LSM 880, Oberkochen, Germany)  
189 equipped with a 20x air objective (LD A-Plan) and temperature and CO<sub>2</sub> control.

190

#### 191 Sample preparation for single-cell force spectroscopy

192

193 2-well culture inlets (catalog no. 81176, Ibidi) were placed in a glass bottom atomic  
194 force microscopy dish (catalog no. GWST-3512, WillCo Wells). 2 000 cells (SNAP-E-  
195 cadherin or E-cadherin-GFP) were seeded into each inlet and incubated overnight at  
196 standard culture conditions. To prevent cell adhesion, the area outside the inlet was  
197 coated with 0.1 μg/ml Poly-L-lysine-Poly-ethylene-glycol (PLL(20)-g[3.5]-PEG(2),  
198 SuSoS, Switzerland). On the next day, the area outside the inlet was washed with PBS  
199 and dried at 37 °C. If no DNA linker was used for the experiment, adherent cells within  
200 the inlet were washed with warm PBS. The inlet was removed and the whole dish was  
201 filled with 3 ml medium. Freshly trypsinized cells were added to the dish excluding the  
202 area occupied by adherent cells.

203 When using the DNA linker, the adherent cells within the inlet were washed with warm  
204 PBS, the cultivation medium was replaced with linker medium containing 1 μM DNA

205 Linker strand 1 and incubated for 1 h at standard conditions. In parallel, freshly  
206 trypsinized cells were incubated with linker medium containing 1  $\mu$ M DNA Linker strand  
207 2. The adherent cells were washed with warm PBS. The inlet was removed and the  
208 whole dish was filled with 3 ml culture medium. The trypsinized cells were added to the  
209 dish excluding the area occupied by adherent cells.

210

### 211 Single-cell force spectroscopy

212

213 For single-cell force spectroscopy, we used a NanoWizard 3 (JPK instruments, Bruker,  
214 Berlin), equipped with a CellHesion module (JPK instruments, Bruker, Berlin) and  
215 temperature and CO<sub>2</sub> control. Tipless cantilevers (catalog no. MLCT-O10, Bruker,  
216 Berlin) were functionalized with concanavalin-A (ConA-biotin; catalog no. C2272,  
217 Sigma) to facilitate cell capturing, adapting the protocol from <sup>8</sup>. Briefly, the cantilevers  
218 were cleaned for 15 min in an ultraviolet radiation and ozone (UV-O) cleaner (Jetlight)  
219 and placed in a Petri dish covered with parafilm. The cantilevers were then incubated  
220 overnight in 50  $\mu$ L droplets of biotin-BSA (1 mg ml<sup>-1</sup> in NaHCO<sub>3</sub> buffer, 100 mM, pH  
221 8.6, catalog no. A6043, Sigma), after which they were washed three times by  
222 immersion in fresh PBS. 50  $\mu$ L droplets of streptavidin (1 mg ml<sup>-1</sup> in PBS, catalog no.  
223 S4762, Sigma) were added to the cantilevers. After 30 min incubation, the cantilevers  
224 were washed three times in PBS and placed in 50  $\mu$ L droplets of ConA-biotin for  
225 additional 30 min. Then, the cantilevers were washed three times with PBS and placed  
226 in fresh PBS until use.

227 Immediately before use, cantilevers were calibrated with the thermal tune method <sup>9</sup> ( $k$   
228 = 0.01 - 0.03 N m<sup>-1</sup>). The experiment was performed in standard culture medium. For  
229 catching cells, the cantilever was brought into contact with a non-adherent cell at 1-3  
230 nN constant force for 60-120 sec, after which the cell-functionalized cantilever was  
231 retracted and allowed to recover for 10 min before measuring cell-cell interactions.  
232 Then, the cell-functionalized cantilever was brought in contact with an adherent cell at  
233 1 nN constant force for 2, 5 or 10 sec, before retraction, leading to the acquisition of a  
234 force-distance cycle. For each cell-functionalized cantilever, the process was repeated  
235 with 5 - 10 adherent cells. Between every measurement, cells were left to recover for  
236 1 min. Detachment forces were calculated using the JPKSPM Data Processing  
237 software. The values were plotted using GraphPad Prism 9. Error bars show the  
238 standard deviation. Plots generated from 3 independent experiments ( $N = 3$ ). Number

239 of measured cells:  $n(\text{E-cadherin-GFP}) = 28$ .  $n(\text{SNAP-E-cadherin}) = 37$ .  $n(\text{SNAP-E-cadherin} + \text{DNA linker}) = 29$ .

241

#### 242 Toehold-mediated strand displacement

243

244 A431D-SNAP-E-cadherin cells were seeded on a glass bottom imaging dish (catalog  
245 no. 81218, Ibidi) to reach a confluency of about 90%. Before the experiment, they were  
246 rinsed with warm PBS. They were incubated with the Reversible linker strand 1 tagged  
247 with Atto647N and the complementary DNA linker strand 2 anchored with  
248 Benzylguanine for 1 h at 37 °C and 5% CO<sub>2</sub> in the presence of 10 mM MgCl<sub>2</sub>. After  
249 washing the sample with warm PBS and replacing the linking medium with cultivation  
250 medium supplemented with 10 mM MgCl<sub>2</sub>, it was transferred to a laser scanning  
251 confocal microscope with temperature monitoring (Zeiss LSM 900, Oberkochen,  
252 Germany) equipped with a 63x oil objective (Plan-Apochromat 63×/1.4 Oil DIC M27).  
253 The experiment was performed at room temperature (24 °C).

254 Time-lapse videos (every 30 sec) of the linker tagged with Atto657N and SNAP-E-  
255 cadherin-mCherry were acquired at for 2 min. Then, the invader strand was added to  
256 achieve a concentration of 10 μM (10x excess). The sample was imaged for additional  
257 8 min. 8-bit images with a color depth of 255 intensity values were acquired.

258 Using Fiji<sup>7</sup>, we defined the background as an intensity value of five and all pixels below  
259 this threshold in all images of the time-lapse were set to zero. Then, the mean grey  
260 value was calculated for every image in the time-lapse.

261 The intensity values were normalized to the fraction of the maximum intensity. The  
262 intensity mean of multiple positions was generated and plotted over time using  
263 GraphPad Prism 9. The error bars show the standard deviation of  $N = 3$  experiments  
264 and  $n = 31$  measurements.

265

#### 266 Live imaging of cell-cell adhesion formation

267

268 A431D-SNAP-E-cadherin cells were seeded on a glass bottom imaging dish (catalog  
269 no. 81218, Ibidi) to reach a confluency of about 40%. Before the experiment, they were  
270 rinsed with warm PBS. To label the actin cytoskeleton, SiR actin and verapamil  
271 (catalog no. SC001, Spirochrome, diluted 1:1000) were added to the cultivation medium  
272 and cells were incubated for 1 h at 37 °C and 5% CO<sub>2</sub>.



273 The sample was mounted on an epifluorescence microscope (DeltaVision Imaging  
274 System on Olympus IX71 inverted microscope) equipped with temperature and CO<sub>2</sub>  
275 control and a 60x oil objective (Olympus, Plan Apo, NA = 1.4). E-cadherin-SNAP-  
276 mCherry and SiR actin were visualized by using the appropriate filter sets.  
277 Furthermore, the bottom of the glass coverslip was imaged by Interference Reflection  
278 Microscopy (IRM) by using TRITC excitation and FITC emission. Time-lapse videos of  
279 cells without and with the linker (every 10 minutes) were taken at different positions of  
280 the dish for multiple hours with constant 37 °C and 5% CO<sub>2</sub>. Image acquisition started  
281 20 min after linker addition.

282

### 283 Staining of E-cadherin, actin and $\beta$ -catenin

284

285 Cells were seeded on clean glass coverslips to reach a confluency of about 50 – 70%  
286 on the day of the experiment. They were rinsed with warm PBS and (if applicable)  
287 incubated for 1 h at 37 °C and 5% CO<sub>2</sub> with linker medium. Before fixation, the cells  
288 were rinsed twice with warm PBS. Fixation was carried out in 4% paraformaldehyde  
289 (PFA) for 10 min at room temperature. Cells were permeabilized in 0.4% Triton X-100  
290 in PBS for 5 min followed by 3 x 5 min washing in PBS. To stain the actin cytoskeleton,  
291 samples were incubated with Phalloidin-coumarin (catalog no. P2495, Sigma) diluted  
292 1:200 in 5% BSA in PBS for 1h at room temperature.

293 For indirect immunostaining, samples were blocked with 5% BSA in PBS for 1 h at  
294 room temperature. Binding of primary antibodies was achieved by incubating the  
295 samples as it follows:

296 Anti- $\beta$ -catenin mouse antibody (catalog no. 610153, BD) was diluted 1:100 in 5% BSA  
297 in PBS and incubated for 1 h at room temperature. Anti-E-cadherin mouse antibody  
298 (catalog no. sc-8426, Santa Cruz for E-cadherin-GFP, catalog no. 610181, BD for  
299 SNAP-E-cadherin-mCherry) was diluted 1:100 in 5% BSA in PBS and incubated for 1  
300 h at room temperature. The samples were washed 3 times 5 min with PBS and  
301 incubated with anti-mouse donkey antibody conjugated to AF647 (catalog no. A-  
302 31571, Thermo Fisher), diluted 1:200 in 5% BSA in PBS and incubate for 1 h at room  
303 temperature. Subsequently, samples were washed 3 times 5 min with PBS. To  
304 preserve fluorescence, samples were mounted with Mowiol 488 (catalog no. 81381,  
305 Sigma).

306

### 307 STED microscopy

308

309 Fixed cells stained for E-cadherin-GFP or SNAP-E-cadherin with an antibody  
310 conjugated to AF647 were imaged on an Abberior expert line microscope (Abberior  
311 Instruments GmbH, Germany) with a pulsed STED line at 775 nm using an excitation  
312 laser at 640 nm and spectral detection. The detection window was set to 650-725 nm  
313 to detect AF647-conjugated antibodies. Images were acquired with a 100×/1.4 NA  
314 magnification oil immersion lens (Olympus). The pixel size was set to 20 nm and the  
315 pinhole was set to 1 AU. The confocal as well as the STED laser power were set to  
316 10%. For visualization, the contrast was adjusted using Fiji.

317

### 318 Colocalization of E-cadherin and $\beta$ -catenin

319

320 Fixed samples were mounted on a laser scanning confocal microscope (Zeiss LSM  
321 900, Oberkochen, Germany) equipped with a 63x oil objective (Plan-Apochromat  
322 63×/1.4 Oil DIC M27) and an Airyscan 2 module). For the visualization of F-actin and  
323 E-cadherin, a background subtraction using a 100-pixel sliding paraboloid was used.  
324 The colocalization of  $\beta$ -catenin and E-cadherin was quantified by acquiring line plot  
325 profiles (length = 5  $\mu$ m, width = 20 pixel) at the same positions in both channels in a  
326 single z-slice. The lines were manually placed in a way that the maximum intensity was  
327 at the middle. The intensity distribution was normalized to the fraction of the maximum  
328 value. Multiple line plots were averaged and plotted as intensity over distance using  
329 GraphPad Prism 9. The error bars show the standard deviation of  $N = 3$  preparations  
330 and  $n(\text{E-cadherin-GFP}) = 20$ ,  $n(\text{SNAP-E-cadherin-mCherry}) = 22$  and  $n(\text{SNAP-E-}$   
331  $\text{cadherin-mCherry} + \text{DNA linker}) = 23$  measurements.

332

### 333 Subcellular localization of YAP

334

335 To assess the localization of Yes associated protein (YAP), cells were seeded on clean  
336 glass coverslips to reach a confluency of about 95 - 100% on the day of the experiment.  
337 The cells were cultured, incubated with DNA linkers for 3 h, fixed, permeabilized and  
338 blocked as described in the section above (Staining of actin and  $\beta$ -catenin). Samples  
339 were incubated with Anti-YAP mouse antibody (1:100, catalog no. 101199, Santa Cruz  
340 Biotechnology) for 1 h in 5% BSA in PBS and washed 3 times 5 min with PBS.

341 Subsequently, 1 h incubation with anti-mouse donkey antibody conjugated to AF647  
342 (catalog no. A-31571, Thermo Fisher) diluted 1:200 in 5% BSA in PBS was performed.  
343 After washing (3 times 5 min) with PBS, cells were counter-stained with DAPI (catalog  
344 no. D1306, Thermo Fisher) diluted 1:2000 in PBS for 15 min. Afterwards, samples  
345 were washed 3 times 5 min with PBS. To preserve fluorescence, samples were  
346 mounted with Mowiol 488 (catalog no. 81381, Sigma).  
347 Images of 25 – 30 cells per field of view were acquired at a laser scanning confocal  
348 microscope using a 63x oil objective (Zeiss LSM 900, Oberkochen, Germany) and  
349 visualized using Fiji. Subcellular YAP intensities were quantified using the ImageJ  
350 Macro *Intensity Ratio Nuclei Cytoplasm Tool* (RRID:SCR\_018573). First, a  
351 background correction was performed with all parameters set to zero. The nuclei were  
352 segmented based on the DAPI staining. All areas not segmented as nuclei were  
353 defined as cytosolic. The cytosolic and the nuclear YAP fractions within the image were  
354 quantified and the ratios were calculated. Further data processing was performed in  
355 RStudio running R Version 4.0.3. Measurements with a nuclear/cytosolic ratio below  
356 0.85 were classified as cytosolic, while a ratio above 1.15 indicated nuclear  
357 localization. All measurements in between were classified as uniform. Percentages of  
358 the three localization classes were calculated for all conditions (E-cadherin-GFP,  
359 SNAP-E-cadherin, 3.2 kcal/mol linker, 10.4 kcal/mol linker, 17.7 kcal/mol linker) and  
360 plotted using GraphPad Prism 9.

361

### 362 Collective migration experiments

363

364 2-well culture inlets (catalog no. 81176, Ibidi) were placed in glass bottom culture  
365 dishes.  $5 \times 10^4$  cells (A431D cells expressing SNAP-E-cadherin-mCherry or E-cadherin-  
366 GFP) were seeded in 80  $\mu$ l culture medium into the inserts and incubated overnight at  
367 standard conditions. The cells were washed with warm PBS and the medium was  
368 replaced with medium containing the following DNA linkers: 3.2 kcal/mol, 10.4 kcal/mol  
369 and 17.7 kcal/mol linkers anchored with benzylguanine to SNAP-E-cadherin or the  
370 17.7 kcal/mol linker anchored with cholesterol into the cell membrane. In the case  
371 where no linker was used, fresh culture medium was added. The cells were incubated  
372 for 1 h at standard conditions. Then the inlet was removed, the cells were carefully  
373 rinsed with PBS and the linker medium was replaced with standard cultivation medium  
374 containing 10 mM  $MgCl_2$ .

375 The cells were transferred to a live cell epifluorescence microscope (Leica DMI8  
376 (Wetzlar, Germany) equipped with a 10x phase-contrast air objective and an  
377 incubation chamber) and incubated at 37 °C and 5% CO<sub>2</sub>. Time-lapse videos (every  
378 10 minutes) of the free edge were taken at different positions of the sample for multiple  
379 hours. Trajectories of single cells were manually tracked using the Fiji plugin *Manual*  
380 *Tracking*.

381

### 382 Particle image velocimetry analysis and velocity correlation length calculation

383

384 Time-lapse videos were cropped to a ROI of 385 x 1332 μm and background  
385 subtraction was performed. Therefore, the minimal intensity of the stack was projected  
386 and then subtracted using the *Calculator Plus* plugin. The videos were rotated in a way  
387 that the cells migrate from the left to the right.

388 The individual, cropped and background-subtracted images of the stack were loaded  
389 into *JPIV* (<https://eguvep.github.io/jpiv/index.html>) run in a Python environment. Since  
390 A431D cells do not migrate fast, we performed particle image velocimetry analysis on  
391 images taken 1 h apart (compare image 1 with image 6, image 2 with image 7, etc.)  
392 using first a 64x64 and then a 32x32 pixel interrogation window. The vector was placed  
393 in the middle of the 32x32 window. This generated a vector field with 32x32 pixel-  
394 spaced vectors. The vectors fields were batch-filtered by performing a normalized  
395 median test and a median filter, where all invalid vectors were excluded. These invalid  
396 vectors were replaced by the median.

397 A custom-written Python script was used to format the JPIV data for further processing.  
398 Finally, the velocity of the cell sheet and the velocity correlation were calculated in  
399 MATLAB using a script described elsewhere <sup>10</sup>, which was modified for the analysis of  
400 time-lapse video microscopy <sup>11</sup>.

401 In brief, the displacement vectors were divided by the time difference between the two  
402 images from which they were generated, resulting in the velocity vector  $\mathbf{r}_{i,j}$ , which was  
403 assigned to the central coordinate  $(i,j)$  of each 32x32 window. Since the axial migration  
404 is the dominant migration direction in the described experimental setup, only the lateral  
405 component  $\mathbf{U}_{i,j}$ , perpendicular to the migration direction was used to calculate the  
406 velocity fluctuations  $\mathbf{u}_{i,j}$  as:

407

408 
$$\mathbf{u}_{i,j} = \mathbf{U}_{i,j} - \sum_{i=1} \sum_{m,j=1,n} \frac{\mathbf{U}_{i,j}}{m \times n} = \mathbf{U}_{i,j} - \mathbf{U}_{mean}$$

409

410  $\mathbf{U}_{mean}$  is the mean velocity along the migration front. The lateral correlation function  $\mathbf{C}_r$   
 411 was calculated as:

412

413 
$$\mathbf{C}_r = \frac{\langle \mathbf{u}(r') * \mathbf{u}(r' + r) \rangle_{r'}}{\sqrt{\langle \mathbf{u}(r')^2 \rangle * \langle \mathbf{u}(r' + r)^2 \rangle}}$$

414

415  $\langle \dots \rangle$  is the average and  $r = || \mathbf{r}_{i,j} ||$  is the norm of  $\mathbf{r}_{i,j}$ . The first crossing of the threshold  
 416 0.01 with the lateral correlation function  $\mathbf{C}_r$  was defined as the velocity correlation  
 417 length. The mean correlation length was calculated for each ROI from 20 consecutive  
 418 individual measurements corresponding to images acquired between 3.5 and 7.3 h  
 419 after removing the confinement.

420

#### 421 Statistical analysis

422

423 In GraphPad Prism 9, a one-way ANOVA significance test with Welch's correction was  
 424 performed on the means of the different experiments using Dunnett's multiple  
 425 comparison test. Thereby, the threshold for significance was defined as  $\alpha = 0.05$ . p-  
 426 values between 0.1 and 0.01 correspond to (\*), p-values between 0.01 and 0.001  
 427 correspond to (\*\*), p-values between 0.001 and 0.0001 correspond to (\*\*\*) and p-  
 428 values  $< 0.0001$  correspond to (\*\*\*\*). No statistical significance is denoted as (n.s.).

429 The individual datapoints were plotted together with the results of the statistical  
 430 analysis using GraphPad Prism 9.

431

432 **Supporting Figure 1: Cells linked by cholesterol-anchored DNA on their surface.**

433

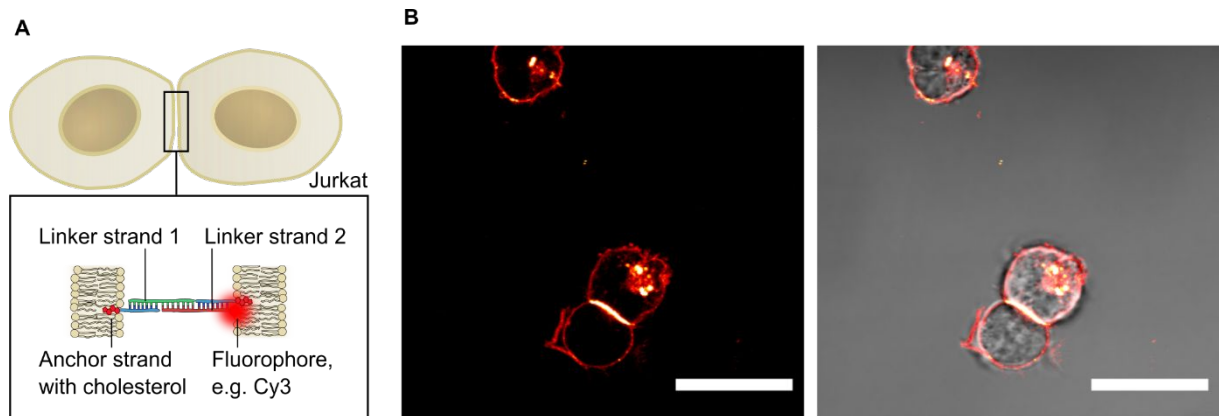

**Supporting Figure S1: Cells linked by cholesterol-anchored DNA on their surface.** **A** Sketch of linked Jurkat cells. Complementary linker strands are bound to an anchor strand which is functionalized with cholesterol. The linker strands can be tagged with a fluorophore, e.g. Cy3 for visualization. **B** Representative live-cell confocal and composite confocal and brightfield images of Jurkat cells incubated with the cholesterol-anchored DNA linker carrying Cy3 (red). Images representative of  $N = 2$  independent experiments. Scale bars, 20  $\mu\text{m}$ .

434

435 **Supporting Figure 2: Expression of SNAP-E-cadherin-mCherry, localization of**  
 436 **the DNA linker and fluorescence decay over time.**

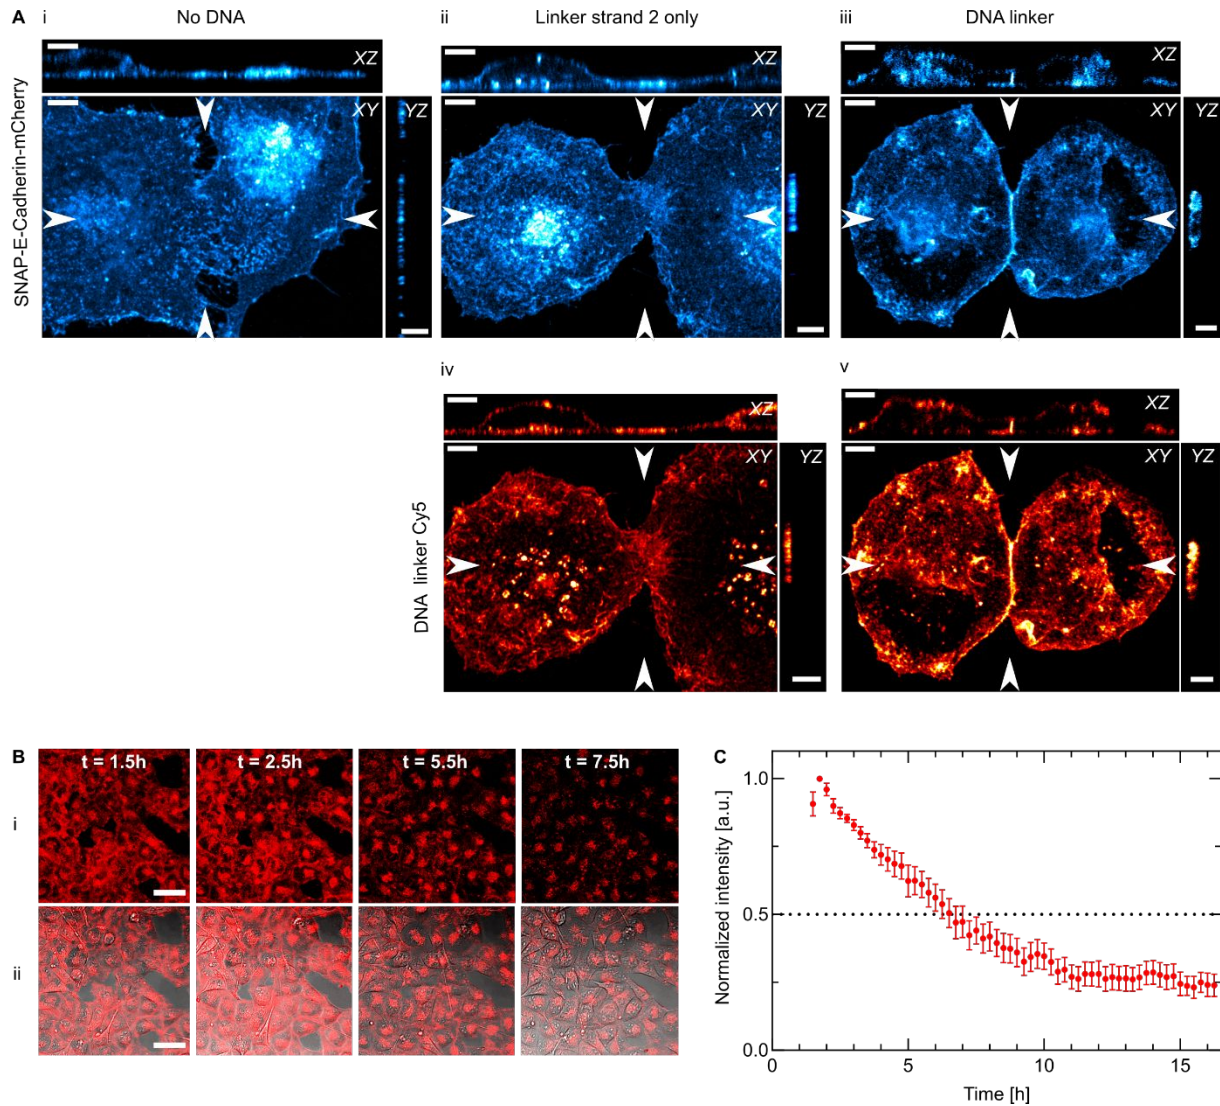

**Supporting Figure S2: A Expression of SNAP-E-cadherin-mCherry and localization of the DNA linker.** Whole-cell 3D reconstruction of the mCherry signal of A431D cells expressing SNAP-E-cadherin-mCherry (*cyan*) and of the Cy5-tagged DNA linker (*red*). Cells were incubated in absence of DNA (i) with linker strand 2 only (ii, iv) or the complete DNA linker (iii, v). Maximum projection and orthogonal slices through the positions indicated by the dashed line are shown. Scale bars, 5  $\mu\text{m}$ . **B Fluorescence decay over time.** Selected timepoints of live-cell confocal (i) and composite brightfield and confocal (ii) images of SNAP-E-cadherin expressing cells pre-incubated with the Cy5 tagged DNA linker (*red*). Scale bars, 50  $\mu\text{m}$ . **C** Quantification of the fluorescence decay over time starting at the beginning of image acquisition, 1.5 h after start of the incubation. Data obtained from one preparation ( $N = 1$ ) and  $n = 6$  measurements. Error bars show the standard deviation.

437

438

439

440 *Supporting Figure 3: Melting curves of the DNA linkers.*

441

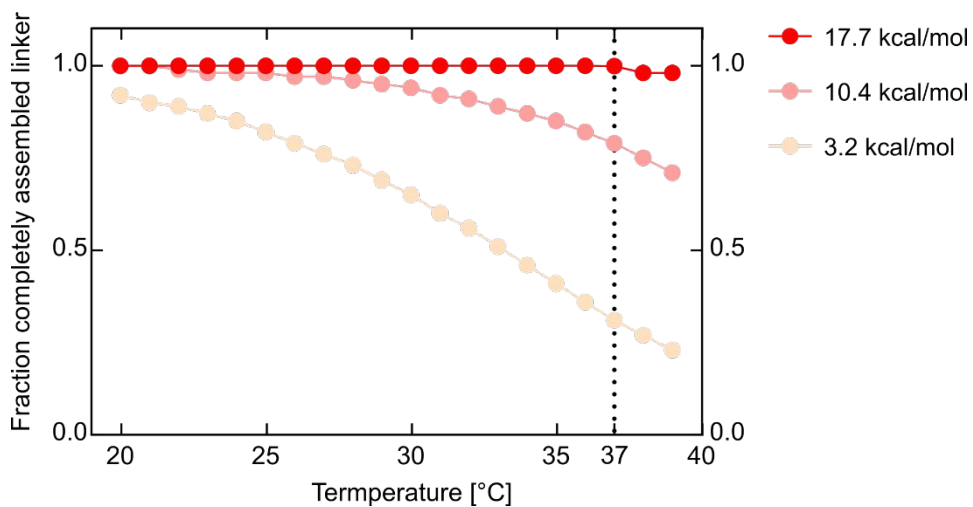

*Supporting Figure S3: Melting curves of the DNA linkers.* The fraction of the completely assembled DNA linkers (17.7 kcal/mol (called DNA linker until mechanotransduction and collective migration experiments (Fig 4)), 10.4 kcal/mol, 3.2 kcal/mol) depending on the temperature were modelled using NUPACK <sup>1</sup>. All experiments except the strand displacement experiment (Fig 2) were performed at a stable temperature of 37 °C, indicated by the dashed line. The final binding strengths of the linkers were corrected by the bound fraction at 37 °C by multiplying the nominal hybridization strength of a linker with its bound fraction.

442

443

444



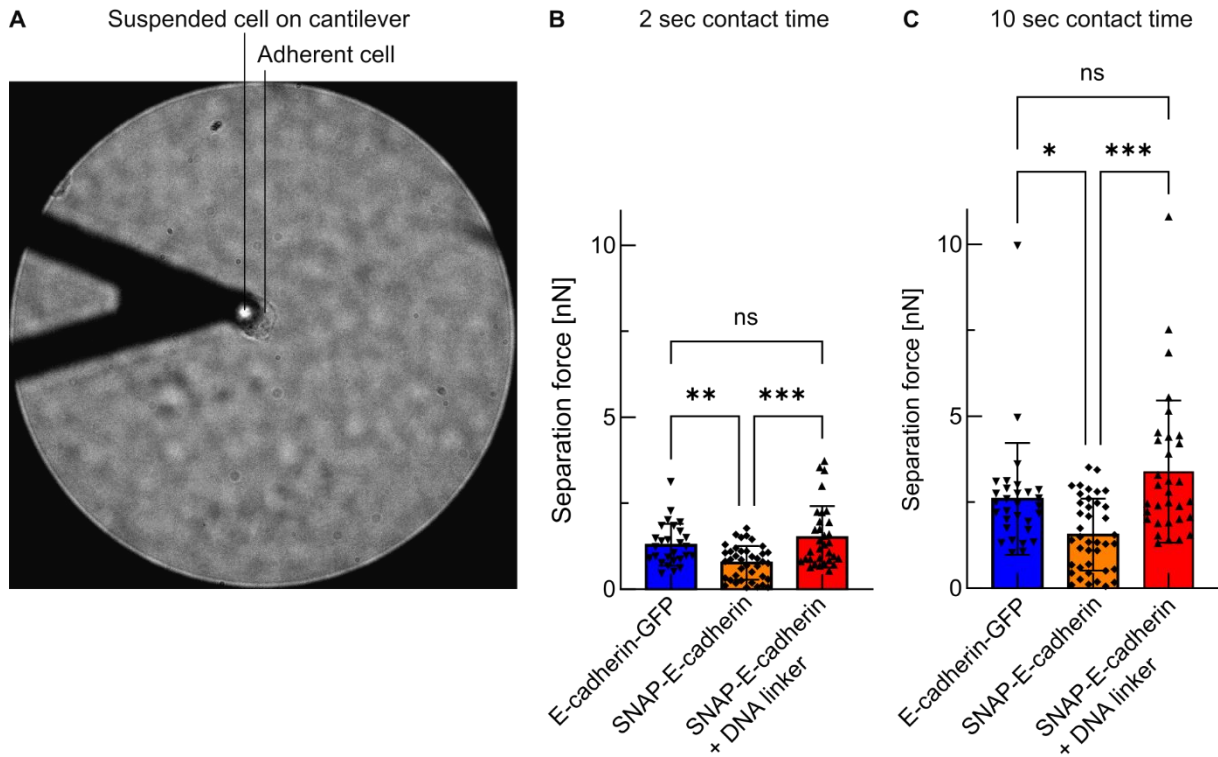

**Supporting Figure S4: Single cell force spectroscopy.** **A** Brightfield image showing a suspended cell bound to the AFM cantilever functionalized with Concanavalin A on top of an adherent cell. **B** Comparison of the separation forces for 2 seconds contact time. Bars show the mean (E-cadherin-GFP =  $1.292 \pm 0.607$  nN; SNAP-E-cadherin =  $0.772 \pm 0.49$  nN; SNAP-E-cadherin + DNA linker =  $1.521 \pm 0.894$  nN). Error bars show the standard deviation. Plots generated from 3 independent experiments ( $N = 3$ ). Number of measured cells:  $n(\text{E-cadherin-GFP}) = 27$ .  $n(\text{SNAP-E-cadherin}) = 39$ .  $n(\text{SNAP-E-cadherin} + \text{DNA linker}) = 32$ . **C** Comparison of the separation forces for 10 seconds contact. Bars show the mean (E-cadherin-GFP =  $2.599 \pm 1.619$  nN; SNAP-E-cadherin =  $1.562 \pm 1.045$  nN; SNAP-E-cadherin + DNA linker =  $3.369 \pm 2.065$  nN). Error bars show the standard deviation. Plots generated from 3 independent experiments ( $N = 3$ ). Number of measured cells:  $n(\text{E-cadherin-GFP}) = 30$ .  $n(\text{SNAP-E-cadherin}) = 40$ .  $n(\text{SNAP-E-cadherin} + \text{DNA linker}) = 32$ . ns no significance. (\*) p-value between 0.1 and 0.01. (\*\*) p-value between 0.01 and 0.001. (\*\*\*) p-value between 0.001 and 0.0001. Multiple ANOVA tests with Welch's correction. Alpha was set to 0.05.

448 *Supporting Figure 5: Super resolution images of E-cadherin at cell-cell contact.*

449

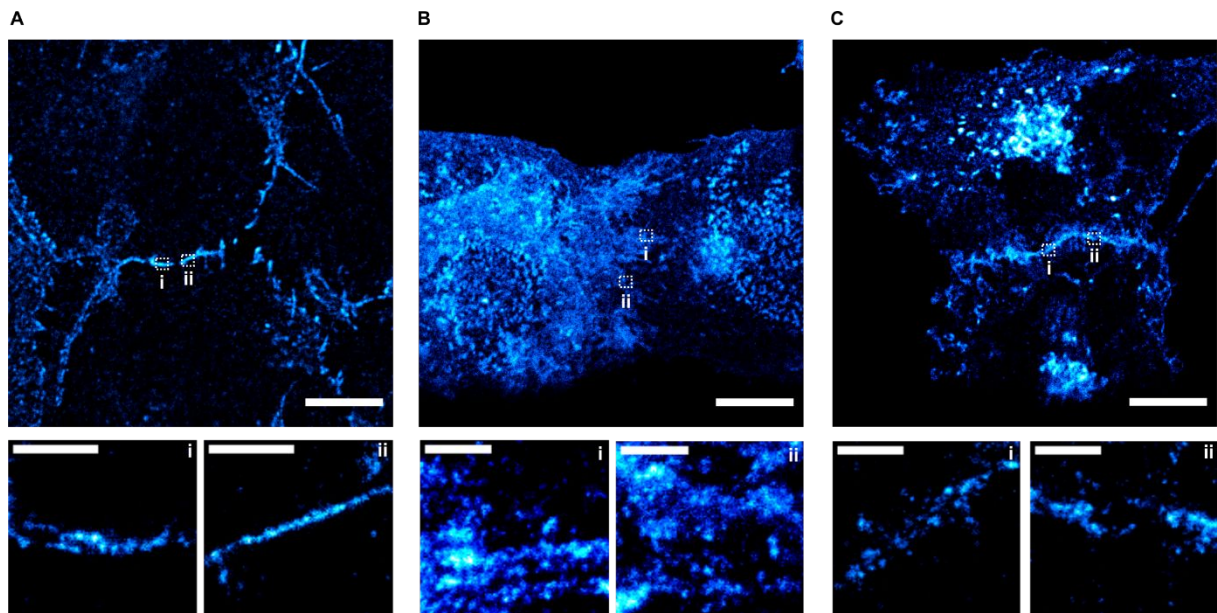

*Supporting Figure 5: Super resolution images of E-cadherin at cell-cell contact.* The intracellular domain of E-cadherin is visualized by indirect immunostaining with AF647. Top row: Overview confocal images, scale bar 10  $\mu\text{m}$ . Bottom row: (i) and (ii) STED images of zoom-ins. The positions are indicated by the dashed lines in the overview image. Scale bar, 1  $\mu\text{m}$ . **A** E-cadherin-GFP. **B** SNAP-E-cadherin. **C** SNAP-E-cadherin + DNA linker. Images representative of  $N = 2$  independent experiments.

450

451 **Supporting Figure 6: Effect of the DNA-E-cadherin hybrid system on collective**  
 452 **migration.**

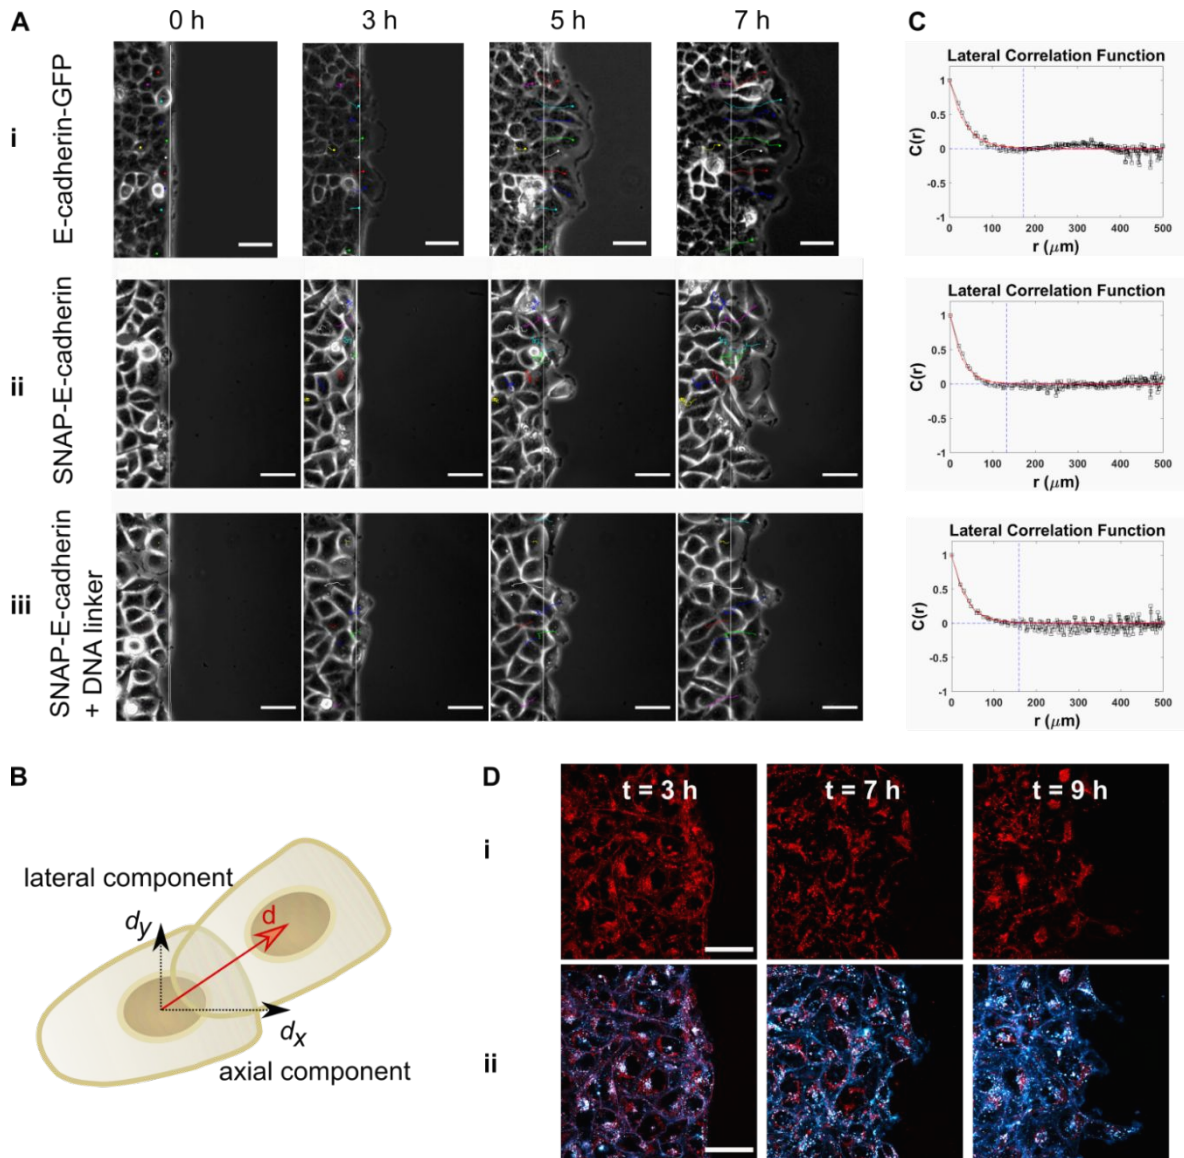

**Supporting Figure S6: Effect of the DNA-E-cadherin hybrid system on collective migration. A** A431D cells were cultured in confinement for collective migration assays. Live-cell time-lapse phase contrast images of the migration front taken at the indicated timepoints after removing the confinement. The dashed line shows the initial position of the collective front. Trajectories of single cells are shown by colored lines. Scale bars, 50  $\mu\text{m}$ . **(i)** E-cadherin-GFP, **(ii)** SNAP-E-cadherin, **(iii)** SNAP-E-cadherin + DNA linker. **B** Principle of the particle image velocimetry (PIV) analysis: The velocity vector  $d$  and its axial ( $d_x$ ) and lateral ( $d_y$ ) component are calculated. Only the lateral component is used for the calculation of the correlation length. Adapted from *Ollech et. al., 2020*. **C** Representative plots of the lateral correlation function  $C(r)$  for **(i)** E-cadherin-GFP, **(ii)** SNAP-E-cadherin, **(iii)** SNAP-E-cadherin + DNA linker. The correlation length is defined as the distance  $r$  at the first zero-crossing of the function, as described previously by *Das et. al., 2015*. **D** Confocal images of the DNA linker (*red*, **i**) and SNAP-E-cadherin-mCherry (*blue*; **ii** overlay) at the migration front at the indicated timepoints. Scale bar. 50  $\mu\text{m}$ .

453

455 **Video descriptions**

456

457 ***Supporting Video 1: 3D projections of single cells.***

458 A431D cells expressing SNAP-E-cadherin-mCherry (*cyan*) were incubated with only  
459 linker strand 2 Cy5 (*red*) or the complete, Cy5-tagged DNA linker (*red*). Images  
460 correspond to Figure 1 B and Figure S2 A. The scale bar shows 5  $\mu\text{m}$ .

461

462 ***Supporting Video 2: Toehold-mediated strand displacement.***

463 A431D cells expressing SNAP-E-cadherin-mCherry (*cyan*) were incubated with  
464 a toehold-carrying DNA linker tagged Atto647N (*red*). The DNA linker diffuses out of  
465 focus after addition of the invader strand (added at  $t = 1.75$  min). Video corresponding  
466 to Figure 2 B. The scale bar shows 50  $\mu\text{m}$ .

467

468 ***Supporting Video 3: Adherens junction formation.***

469 A431D cells expressing SNAP-E-cadherin (*cyan*) were incubated with the DNA linker.  
470 The video starts directly after the linker addition. Bottom of the cell (Interference  
471 Reflection Microscopy, IRM, *grey*) and actin stained with SiR actin (*red*) are shown.  
472 Video corresponding to Figure 2. The scale bar shows 10  $\mu\text{m}$ .

473

474 ***Supporting Video 4: Migration front of cell collectives.***

475 The collective migration of cells expressing SNAP-E-cadherin, without and with the  
476 DNA linker, was imaged in brightfield and individual cells were tracked manually. Video  
477 corresponding to Figure S5 A. The scale bar shows 50  $\mu\text{m}$ .

478

479

480 **Methods References:**

481

- 482 1. Zadeh, J. N.; Steenberg, C. D.; Bois, J. S.; Wolfe, B. R.; Pierce, M. B.; Khan, A.  
483 R.; Dirks, R. M.; Pierce, N. A. *Journal of Computational Chemistry* **2011**, 32, (1), 170-  
484 173.
- 485 2. Zhang, D. Y.; Winfree, E. *Journal of the American Chemical Society* **2009**, 131,  
486 (47), 17303-17314.
- 487 3. Griffith, J. D. *Science* **1978**, 201, (4355), 525-7.
- 488 4. Schmitt S., P. F., Schiltz M., Johnsson K. *Protein Data Bank* **2010**.
- 489 5. Boggon, T. J.; Murray, J.; Chappuis-Flament, S.; Wong, E.; Gumbiner, B. M.;  
490 Shapiro, L. *Science* **2002**, 296, (5571), 1308-1313.
- 491 6. Lewis, J. E.; Wahl, J. K., III; Sass, K. M.; Jensen, P. J.; Johnson, K. R.;  
492 Wheelock, M. J. *Journal of Cell Biology* **1997**, 136, (4), 919-934.
- 493 7. Schindelin, J.; Arganda-Carreras, I.; Frise, E.; Kaynig, V.; Longair, M.; Pietzsch,  
494 T.; Preibisch, S.; Rueden, C.; Saalfeld, S.; Schmid, B.; Tinevez, J.-Y.; White, D. J.;  
495 Hartenstein, V.; Eliceiri, K.; Tomancak, P.; Cardona, A. *Nature Methods* **2012**, 9, (7),  
496 676-682.
- 497 8. Friedrichs, J.; Helenius, J.; Muller, D. J. *Nature Protocols* **2010**, 5, (7), 1353-  
498 1361.
- 499 9. Schäffer, T. E. *Nanotechnology* **2005**, 16, (6), 664-670.
- 500 10. Das, T.; Safferling, K.; Rausch, S.; Grabe, N.; Boehm, H.; Spatz, J. P. *Nature*  
501 *Cell Biology* **2015**, 17, (3), 276-287.
- 502 11. Ollech, D.; Pflästerer, T.; Shellard, A.; Zambarda, C.; Spatz, J. P.; Marcq, P.;  
503 Mayor, R.; Wombacher, R.; Cavalcanti-Adam, E. A. *Nature Communications* **2020**, 11,  
504 (1), 472.
- 505
